# Supplementary material for: Identifying priorities for cancer caregiver interventions: protocol for a three-round modified Delphi study
Source: PubMed Central journal article supplement — BMJ Open. 2019 Feb 13;9(2):e024725. doi: 10.1136/bmjopen-2018-024725 (PMC6398770; doi:10.1136/bmjopen-2018-024725), 2019-02-13
Supplement: bmjopen-2018-024725.draft_revisions.pdf [file bmjopen-2018-024725.draft_revisions.pdf]

# BMJ Open

BMJ Open is committed to open peer review. As part of this commitment we make the peer review history of every article we publish publicly available.

When an article is published we post the peer reviewers' comments and the authors' responses online. We also post the versions of the paper that were used during peer review. These are the versions that the peer review comments apply to.

The versions of the paper that follow are the versions that were submitted during the peer review process. They are not the versions of record or the final published versions. They should not be cited or distributed as the published version of this manuscript.

BMJ Open is an open access journal and the full, final, typeset and author-corrected version of record of the manuscript is available on our site with no access controls, subscription charges or pay-per-view fees (<http://bmjopen.bmj.com>).

If you have any questions on BMJ Open's open peer review process please email [info.bmjopen@bmj.com](mailto:info.bmjopen@bmj.com)

# BMJ Open

## Identifying priorities for cancer caregiver interventions: Protocol for a three round modified Delphi study

|                               |                                                                                                                                                                                                                                                                                                                                                                                                                                                                                                                                                                                                                        |
|-------------------------------|------------------------------------------------------------------------------------------------------------------------------------------------------------------------------------------------------------------------------------------------------------------------------------------------------------------------------------------------------------------------------------------------------------------------------------------------------------------------------------------------------------------------------------------------------------------------------------------------------------------------|
| Journal:                      | <i>BMJ Open</i>                                                                                                                                                                                                                                                                                                                                                                                                                                                                                                                                                                                                        |
| Manuscript ID                 | bmjopen-2018-024725                                                                                                                                                                                                                                                                                                                                                                                                                                                                                                                                                                                                    |
| Article Type:                 | Protocol                                                                                                                                                                                                                                                                                                                                                                                                                                                                                                                                                                                                               |
| Date Submitted by the Author: | 18-Jun-2018                                                                                                                                                                                                                                                                                                                                                                                                                                                                                                                                                                                                            |
| Complete List of Authors:     | Blaschke, Sarah; Peter MacCallum Cancer Institute, Department of Cancer Experiences Research<br>Lambert, Sylvie; McGill University, Ingram School of Nursing; McGill University<br>Livingston, Patricia; Deakin University, Burwood, Australia<br>Aranda, Sanchia; Cancer Council Australia<br>Boltong, Anna<br>Schofield, Penelope ; The University of Melbourne; Swinburne University of Technology<br>Chambers, Suzanne; Griffiths University, Menzies Health Institute Queensland<br>Krishnasamy, Meinir; University of Melbourne,<br>Ugalde, Anna; Deakin University & Cancer Council Victoria, Faculty of Health |
| Keywords:                     | Delphi, Caregiver, Cancer, Intervention                                                                                                                                                                                                                                                                                                                                                                                                                                                                                                                                                                                |
|                               |                                                                                                                                                                                                                                                                                                                                                                                                                                                                                                                                                                                                                        |

SCHOLARONE™  
Manuscripts

Only

## Identifying priorities for cancer caregiver interventions: Protocol for a three round modified Delphi study

### Authors

Sarah Blaschke<sup>1</sup>, Sylvie D. Lambert<sup>2</sup>, Patricia Livingston<sup>3</sup>, Sanchia Aranda<sup>4</sup>, Anna Boltong<sup>5,6</sup>, Penelope Schofield<sup>7</sup>, Suzanne Chambers<sup>8</sup>, Meinir Krishnasamy<sup>9,10</sup>, Anna Ugalde<sup>3</sup>

<sup>1</sup> Department of Cancer Experiences Research, Peter MacCallum Cancer Centre, Melbourne, Australia

<sup>2</sup> Department of Biology, McGill University, Montreal, Canada

<sup>3</sup> School of Nursing & Midwifery, Faculty of Health, Deakin University, Geelong, Australia

<sup>4</sup> Cancer Council Australia, Sydney, Australia

<sup>5</sup> Cancer Information and Support Service, Cancer Council Victoria, Melbourne, Australia

<sup>6</sup> Melbourne School of Health Sciences, University of Melbourne, Parkville, Australia

<sup>7</sup> Department of Psychology, Swinburne University, Hawthorn, Australia

<sup>8</sup> Menzies Health Institute Queensland, Griffith University, Gold Coast, Australia

<sup>9</sup> Department of Nursing, School of Health Sciences, University of Melbourne, Parkville, Australia

<sup>10</sup> Victorian Comprehensive Cancer Centre, Parkville, Australia

### Corresponding Author

Anna Ugalde

T: +61 3 9244 3937

E: [a.ugalde@deakin.edu.au](mailto:a.ugalde@deakin.edu.au)

A: 1 Gheringhap Street Geelong, Victoria, Australia 3220

## Abstract

**Introduction** Cancer is often considered a chronic disease, and most people with cancer have a caregiver, often a family member or friend who provides a significant amount of care during the illness trajectory. Caregivers are frequently in need of support, and a range of interventions have been trialed to improve outcomes. Consensus for optimal ways to support caregivers is not known. The aim of this protocol paper is to describe procedures for a modified Delphi study to explore expert consensus about important factors when developing caregiver interventions.

**Methods and analysis** Online modified Delphi methodology will be used to establish consensus for important caregiver intervention factors incorporating the PICO framework. Round 1 will comprise a free-text questionnaire and invite the panel to contribute factors they deem important in the development and evaluation of caregiver interventions. Round 2 is designed to determine preliminary consensus of the importance of factors generated in Round 1. The panel will be asked to rate each factor using a 4-point Likert-type scale. The option to state panelists reasoning for their rating will be provided. Descriptive statistics (median scores and IQR) will be calculated to determine each item's relative importance. Levels of consensus will be assessed based on a predefined consensus rating matrix. In Round 3, factors will be re-circulated including aggregate group responses (statistics and comment summaries) and panelist's own Round 2 scores. Panelists will be invited to reconsider their judgments and resubmit ratings using the same rating system as in Round 2. This will result in priority lists based on the panel's total rating scores.

**Ethics and dissemination** Ethics for this study has been gained from (blinded for review) Human Research Ethics Committee. It is anticipated that the results will be published in peer-reviewed journals and presented in a variety of forums.

## Strengths and limitations of the study

We adopted the PICO framework for the retrieval of relevant information with which to address the research question and Delphi methodology to explore levels of consensus and assess expert opinion.

Our study methodology can be replicated by other intervention researchers seeking to investigate and design appropriate interventions for varied clinical populations.

A research advisory committee is assembled to inform and guide the purposive sampling of relevant stakeholders with high expertise in relevant fields, which ensures the input of high quality information.

1  
2  
3  
4  
5  
6  
7  
8  
9  
10  
11  
12  
13  
14  
15  
16  
17  
18  
19  
20  
21  
22  
23  
24  
25  
26  
27  
28  
29  
30  
31  
32  
33  
34  
35  
36  
37  
38  
39  
40  
41  
42  
43  
44  
45  
46  
47  
48  
49  
50  
51  
52  
53  
54  
55  
56  
57  
58  
59  
60

Given the paucity of evidence with regard to cancer health care professionals' appreciation of the needs of caregivers, this study focuses solely on participants in professional and academic roles. However, data from this study will be used to inform future projects that focus specifically on the views of caregivers.

For peer review only

## INTRODUCTION

The growing rate of people affected by cancer and advances in screening, early detection and treatment mean that more people are expected to live longer with the disease [1]. Many people with cancer have a caregiver, often a friend or family member, who undertakes complex and demanding caregiving tasks [2], often without training or resources [3]. Caregiver needs have shown to parallel or even exceed those of the person with cancer themselves [4, 5]. Negative impacts on caregivers have been reported and can include burden of care provision, depression, anxiety, reduced quality of life, loss of self-identity, loneliness, isolation, and a need for more information [6-11], although, some people also experience positives associated with care provision [7, 12]. Two thirds of caregivers, in a study of two hundred caregivers of people with advanced cancer, reported providing over 80% of the care [2]. Reported caregiving tasks included providing emotional support, administering medications, assisting with bathing, toileting and feeding and other daily living and domestic tasks [2].

Several systematic reviews have been conducted summarizing the cancer caregiver intervention literature [13-20]. Northouse and colleagues [21] presented a meta-analysis of the efficacy of caregiver intervention trials, categorising interventions as psychoeducational, skills training and therapeutic counselling. It was concluded that interventions had small to medium effects and were able to reduce burden, improve coping, self-efficacy and quality of life [21]. In a recent update of the Northouse review, Ferrell and Wittenberg [20] identified an increase in trials, noting that more interventions are being conducted in home settings or by telephone. They also found significant diversity in intervention studies for type, dose, format and content of interventions as well as measures and reported outcomes. Furthermore, the need to translate trials into practice was highlighted [20]. These reviews outline substantial variety in how caregiver interventions are delivered.

Given that interventions are costly, time consuming and challenging to conduct, it is essential that we understand the groups of caregivers likely to benefit from intervention and what to target within an intervention and when to intervene. A recent international Delphi survey set out to identify priority topic areas for cancer caregiver research [22]. Topics achieving high consensus across expert panels included the financial impact of caregiving, routine screening of caregiver-reported outcomes and educating clinicians about caregiver needs. This research presents an important list of broad

1  
2  
3 priorities, however there is opportunity to build on this work through understanding consensus about  
4 how caregiver interventions can be delivered.  
5

6  
7  
8 The growing number of caregivers and associated burden requires careful consideration of multi-  
9 stakeholder views in order to build a comprehensive understanding of the factors that matter most for  
10 developing appropriate support interventions. The present study consists of multi-stakeholder enquiry  
11 by using a sample of clinical and content experts to determine relevant factors for the practical and  
12 clinical delivery of caregiver intervention.  
13  
14

### 15 16 17 **Aim**

18 The aim is to solicit knowledge and consensus from relevant cancer-specific healthcare and academic  
19 experts in order to develop guidelines for effective caregiver intervention design and evaluation. The  
20 study will aim to elicit levels of expert consensus for five factors: 1) views on the caregivers who  
21 should be the target of interventions; 2) the content and mode of delivery of the interventions; 3) the  
22 potential outcomes and benefits; 4) the appropriate approaches and methodologies to evaluate  
23 caregiver interventions and 5) the barriers to conducting caregiver research  
24  
25  
26  
27  
28  
29

## 30 **METHOD AND DESIGN**

### 31 **Study design**

32 Determining critical factors for the design and evaluation of caregiver interventions requires rigorous  
33 enquiry into available evidence and relevant expert knowledge. To this end, a new Delphi  
34 methodology was developed, which incorporates the PICO framework [23]. PICO refers to Patient  
35 problem, Intervention, Comparison, and Outcome and is a framework used to answer a well-focused  
36 clinical question by adopting an effective and evidence-based research approach [23]. The PICO  
37 framework is used in this Delphi study to focus expert participation on systematically formulating  
38 factors that are directly relevant to addressing the question at hand. Delphi research uses a multi-  
39 stage, structured and iterative feedback process to elicit levels of opinion consensus on a given topic.  
40 The present study uses the PICO framework in combination with Delphi methodology to  
41 systematically generate new and translatable knowledge. Applying this method, items under each  
42 subject heading will be generated and prioritized based on expert consensus and guidelines for future  
43 caregiver intervention development formulated. The study flow is illustrated in Figure 1. The study  
44 design follows the Standard Protocol Items: Recommendations for Interventional Trials (SPIRIT)  
45 2013 Checklist [24].  
46  
47  
48  
49  
50  
51  
52  
53  
54  
55  
56  
57  
58  
59  
60

[INSERT FIGURE 1 HERE]

**Figure 1** Design of modified Delphi using a series of three questionnaires (Q1 - 3).

### **Advisory committee**

As recommended for priority setting research, an advisory committee has been established [25, 26] with topic and methodological experts, researchers and healthcare practitioners from a range of disciplines. The advisory committee will contribute to the selection of a sample of experts to be invited to the Delphi expert panel and develop guidelines based on the items that have achieved consensus.

### **Rounds and timeline**

In research areas where little is known, it is recommended to plan up to four Delphi rounds to ensure rigor in the development of items and consensus building [27]. However, where research builds on existing knowledge, a trend is evident toward adopting fewer rounds with successful outcomes. Delphi designs with fewer than four rounds have elicited expert agreement on topics such as the supportive care needs of adult cancer survivors [28], the needs of adolescents and young adults survivors [29] and standardized criteria for automatic referral to palliative care services [30]. The present study requires collection of focused expert knowledge to generate pertinent items and understanding of expert consensus in regards to the importance of items in order to set priorities. A 3-round Delphi is proposed to generate pertinent items (Round 1), explore preliminary consensus (Round 2), and finally rate the short-listed items to determine priorities based on levels of consensus achieved (Round 3). The feedback process will be conducted online in four week intervals [31] accounting for sufficient time to gather input, aggregate and re-circulate group responses, and to stepwise build questionnaires as data are collected and analyzed.

### **Questionnaires**

Delphi is an iterative research methodology that builds upon ongoing data collection. Its primary research procedure is the systematic sequencing of questionnaires. Questionnaire 1 (Q1) will be available for distribution at the start of recruitment and Questionnaire 2 (Q2) and Questionnaire 3 (Q3) will be built based on participants' input. Q1, Section A to E representing five factors are



1  
2  
3 outlined in the Data Collection section below. Q1 (item generation) will take approximately 15  
4 minutes to complete and Q2 and Q3 (rating) are anticipated to take no more than 10 minutes to  
5 complete.  
6  
7

## 8 9 **PARTICIPANTS**

### 10 **Selection of experts**

11 Expertise is defined as having both knowledge and experience in a given field and an expert is a  
12 person with the capacity to articulate informed opinion and provide relevant input about their area of  
13 expertise [32]. This study will purposely sample national and international experts in professional  
14 and academic roles from relevant backgrounds able to provide salient information about caregiver  
15 intervention priorities. The advisory committee will use its own professional networks and seek  
16 further referrals for eligible study participants (snowballing). Additionally, authors who have led  
17 intervention studies included in a recent caregiver systematic review will also be invited to  
18 participate in this Delphi (blinded for review). The following list of inclusion criteria was developed  
19 to ensure recruitment of experts with strong understanding of cancer caregiver issues: (1) healthcare  
20 or allied health practitioner with extensive clinical practice experience in oncology; or (2) have  
21 published in the area of cancer caregiver research in the last 10 years, (3) sufficient written English  
22 skills to communicate ideas effectively and capable of contributing relevant input; and (4)  
23 willingness and availability to complete all three rounds.  
24  
25  
26  
27  
28  
29  
30  
31  
32  
33  
34

### 35 **Patient and Public Involvement**

36 In this study, experts are referred to as professionals and academics with expertise, rather than  
37 caregivers. Previous Delphi studies include consumers as experts (e.g. [29]), whereas others do not  
38 include the target group (e.g. [28]). While consumer input is known to improve the quality of  
39 research [56], it was expected that caregivers would have unique views and perspectives [22] that  
40 would benefit from being fully explored with a separate, dedicated and purposefully designed study,  
41 incorporating a diverse and representative range of caregivers. This is considered an important  
42 avenue for future work. Patients and public are not involved in this Delphi study.  
43  
44  
45  
46  
47  
48

### 49 **Sample size**

50 Delphi panel membership is determined by the study purpose and its constraints [33] and can range  
51 from single digits to low hundreds [34]. A panel of ten to eighteen experts is recommended to ensure  
52 sufficient contributions [27, 34]. However, quality of data and levels of expert census are considered  
53 of greater importance than the statistical power of response [35, 36], which distinguishes Delphi  
54 research from a quantitative survey [34]. Taking account of the commonly high dropout rate in  
55  
56  
57  
58  
59  
60

1  
2  
3 Delphi studies, the recruitment target for this study is a maximum of 30 experts to allow for the input  
4 of a diversity of views while accounting for expected attrition. A maximum of 100 experts will be  
5 invited to achieve the minimum target.  
6  
7

### 8 9 **Recruitment**

10 Recruitment will use email invitations containing a short description of the study purpose and  
11 participation requirements and Q1. Completion and return of Q1 will be considered implied consent.  
12 Participation is voluntary and can be withdrawn at any stage. Participants can request their  
13 demographic information and where possible other contributions to be withdrawn; however, due to  
14 the study's iterative process not all contributions can be withdrawn once included in previous rounds.  
15 If provided, reasons for declining or later withdrawal from the study will be recorded.  
16  
17  
18  
19  
20

### 21 **DATA COLLECTION AND ANALYSIS**

22  
23  
24 The data collection and analysis sequence is illustrated in Figure 2 and the procedures for each round  
25 (questionnaire) are detailed below.  
26  
27

28  
29 *[INSERT FIGURE 2]*  
30

31 **Figure 2** Delphi data collection and analysis sequence.  
32  
33  
34

### 35 **Q1 Generation of items**

36 Q1 aims to elicit relevant issues for consideration (items), before quantitatively rating their levels of  
37 importance in future rounds as judged by the expert panel.  
38  
39

40 Sections A to E represent five different factors, and these sections will invite experts to list at least  
41 six items they deem of critical importance to the subject headings introduced. Additional space is  
42 provided for detailed descriptions should participants wish to elaborate on their responses.  
43  
44

#### 45 A. Caregiver characteristics

46 *What caregiver factors are important in cancer caregiver intervention research? Consider*  
47 *factors such as demographic, medical, personal or clinical characteristics, to identify high*  
48 *priority groups.*  
49  
50

#### 51 B. Intervention components

52 *What intervention components are important in cancer caregiver intervention research?*  
53 *Consider intervention content, and delivery method, setting and doses, for delivery of*  
54 *optimal interventions.*  
55  
56

#### 57 C. Outcomes

58  
59  
60

1  
2  
3 *Cancer caregiver interventions can target various outcomes, including caregiver, patient or*  
4 *health service factors. Consider what are the important outcomes for cancer caregiver*  
5 *intervention, including who may benefit from caregiver interventions and for which*  
6 *outcomes.*  
7

#### 8 D. Study characteristics

9  
10 *Cancer caregiver intervention outcomes can be investigated using a variety of approaches.*  
11 *Consider which methodologies are important in understanding and evaluating the benefits of*  
12 *caregiver interventions.*  
13

#### 14 E. Barriers

15  
16 *What are the most significant barriers to the conduct of caregiver intervention research?*  
17

### 18 Q1 Analysis

19  
20 All data (items and explanations) will be entered and managed in qualitative data analysis software  
21 NVivo [37]. The analysis will involve removing identical responses before subjecting the list of items  
22 to interpretive content analysis as is consistent with the exploratory aim of the first questionnaire.  
23 Each item will be examined and a broad summarizing label (code) will be assigned. These codes will  
24 arise from the data itself rather than be pre-defined. As the analysis progresses and multiple similar  
25 and connected codes arise, the analyst will begin grouping them into summarizing categories. Once  
26 all items are coded and sorted into categories, the analyst will re-read all data and refine the  
27 terminology to ensure all contributions are captured. An inter-rater process will assist interpretative  
28 congruity as recommended for qualitative analysis [38]. In this step, a second member of the project  
29 team will read all raw data and analytic work and any disagreement about interpretation or category  
30 development will be discussed with the analyst until agreement is reached. This generates a list of  
31 statements pertaining to each category.  
32  
33  
34  
35  
36  
37  
38  
39  
40

### 41 Q2 Rating items

42  
43 Q2 will list all generated items according to subject headings they were submitted under and panelists  
44 will be asked to rate each item's importance in order to establish preliminary levels of consensus.  
45 Each item will be presented with a corresponding 4-point Likert-type scale (1 = Very unimportant, 2  
46 = Unimportant, 3 = Important, 4 = Very important) and an option to indicate "No judgment" will be  
47 provided including space for panelists to state their reasoning. To minimize response bias, Q2 will  
48 list the items generated in Q1 without response statistics (number of experts who contributed to each  
49 items).  
50  
51  
52  
53  
54

### 55 Q2 Analysis

Statistical analyses will be performed using IBM SPSS Statistics [39]. Descriptive statistics (median scores and IQR) will be calculated to indicate each item's relative importance based on the full response sample. Delphi studies use variable definitions and thresholds for determining opinion consensus [27]. For purposes of assessing levels of consensus, this study will use a predefined rating matrix, adapted from Meskell and colleagues [40], which is illustrated in Table 1.

### Q3 Prioritizing items

Q3 will be designed to provide panelists the opportunity to reconsider their responses in light of preliminary levels of consensus achieved about the importance of each item. Additionally, the panel will be presented with summary comments about the reasoning for judgments made by other panelists. To assist clarity and consistency, Q3 will follow the same layout as the previous one. All items will be relisted under their respective subject headings with corresponding 4-point Likert-type rating scales. Additionally, this questionnaire will include aggregated statistical group responses generated for each items including: the level of importance of each factor based on group consensus thus far, a summary of group comments and reasoning for ratings of each item, and individual panelist's own Q2 response.

### Q3 Analysis

Analysis for data collected in Q3 will use the same strategy as in the preceding round. The study aims to explore and quantify levels of agreement rather than achieve consensus, therefore this Delphi has been designed to progress through a pre-defined number of three rounds rather than continue until consensus is reached. Statistics will be calculated (median scores and IQR) to describe each item's importance and group consensus will be determined based on the consensus rating matrix. A final priority list of items will be generated.

**Table 1** Consensus rating matrix.

| Importance level | Numerical category of importance rating | High consensus                | Moderate consensus            | Low consensus                 | Direction of consensus |
|------------------|-----------------------------------------|-------------------------------|-------------------------------|-------------------------------|------------------------|
| Very unimportant | One                                     | 70% or more in category one   | 60% or more in category one   | 50% or more in category one   | Low importance         |
| Unimportant      | Two                                     | 70% or more in category two   | 60% or more in category two   | 50% or more in category two   |                        |
| Important        | Three                                   | 70% or more in category three | 60% or more in category three | 50% or more in category three | High importance        |
| Very important   | Four                                    | 70% or more in                | 60% or more in                | 50% or more in                |                        |

|  |  |               |               |               |  |
|--|--|---------------|---------------|---------------|--|
|  |  | category four | category four | category four |  |
|--|--|---------------|---------------|---------------|--|

## ETHICS

The study was approved by the (blinded for review) Human Research Ethics Committee. All consented participants will be assigned a unique identification code. Collected demographic information and contact details will include: name, contact phone number, e-mail address, description of professional role, years served in field of expertise, country of professional residence/affiliation. Participants' identifiable information will be matched with their unique identification code in one digital masterfile only. All data collected will be stored safely and securely in locked filing cabinets and in password protected folders on a secure drive (electronic data) that can be accessed only by the study investigators. Data will be kept for 5 years as per local ethics guidelines.

## DISCUSSION

### Combining the PICO framework and Delphi methodology

It is recommended that evidence-based medicine include a rigorous process for the formulation of clinical questions to find precise answers [41, 42]. Research shows that clinicians cross numerous questions in their practice and that up to two thirds remain unanswered [43, 44]. It is held that better question formulation and search process can lead to better solving unanswered questions [42, 45]. To this end, the PICO framework was developed to facilitate focused formulation of answerable clinical queries [23]. PICO is designed to elicit and precisely articulate the elements contained in clinicians' queries, which is considered key to efficiently retrieving relevant evidence for making evidence-based clinical decisions [46, 47] and for guiding searches and content for systematic literature reviews [48, 49]. The PICO framework lends itself to addressing questions such as caregiver intervention priorities, which require collection of items relating to caregivers themselves (P), the types and content of effective interventions (I) and the expected outcomes (O). While the study's information needs does not include a Comparison/Control (C) component, we are additionally interested in discerning the appropriate methodologies for evaluating and researching intervention outcomes. Huang and Demner-Fushman's [42] investigation of the PICO's suitability for clinical queries found that not all questions necessarily utilize all PICO components; in their study of 59 real-world clinical questions only two contained all four PICO elements. While the findings affirm the usefulness of PICO overall, it was noted that complex, real-world questions not always fit its formula squarely and may require modifications [42]. Our research question is focused on the need for healthcare response to the detected lack of appropriate caregiver support.

1  
2  
3 The present study aims to not only collect high quality evidence and expert knowledge but  
4 also prioritize areas of intervention and elicit levels of consensus amongst experts. The findings will  
5 be placed into context with current research priorities and a growing body of work aiming to improve  
6 cancer caregiver outcomes [22]. The Delphi method is well suited to solicit knowledge from varied  
7 expertise and delineate degrees of (dis)agreement [34, 50] and alignment with other work. Delphi  
8 studies are particularly effective in investigating areas where little prior knowledge exists [51], where  
9 empirical data is lacking [52] and, where priority setting is desired [34]. The specific advantages of  
10 the Delphi method adopted in our research include: the ability to collect expert opinion from diverse  
11 disciplines [27], rapid communication processes [53]; overcoming peer-pressure and power struggles  
12 through providing an anonymous forum [54], and the ability to coordinate multi-disciplinary  
13 participants across countries [33]. The present paper aims to illustrate our study design clearly in  
14 order for other intervention researchers to replicate the approach for answering similar questions for  
15 different clinical populations or healthcare contexts. The combination of PICO and Delphi  
16 methodology presents a novel and promising approach to rigorously and rapidly generating  
17 instructive answers to complex healthcare problems.  
18  
19  
20  
21  
22  
23  
24  
25  
26  
27  
28

### 29 **What is an “expert”**

30 The success of a Delphi study is contingent on participants who are able to provide relevant input on  
31 the research topic. The absence of specific guidelines for identifying experts challenge Delphi  
32 researchers to seek suitable participants with appropriate expertise [34, 55]. “Informed advocates”  
33 [34] and “specialist in their field” [33] are terms used by Delphi researchers, but there is little about  
34 the specific qualities needed. In the absence of clear guidelines, the current study will follow the  
35 definition adopted by Blaschke and colleagues [32], which describes the prerequisite qualities of  
36 merited Delphi panelists, “individuals who possess both knowledge and experience representative of  
37 the capacity to articulate informed opinion and provide relevant input about a given topic” (p. 2 – 4).  
38 Consumers are not included in this research with the aim to conduct further work dedicated to  
39 exploring their views.  
40  
41  
42  
43  
44  
45  
46  
47

### 48 **The Delphi expert panel**

49 Depending on the research objectives, Delphi panels may comprise of experts from a single  
50 discipline or represent a broad mix. A heterogeneous pool of experts may serve innovation and  
51 creative, combinatorial insights into unexplored questions through crosspollination of expertise.  
52 When a research question is already well-focused, a homogeneous panel of experts may serve  
53 addressing an identified research need. The present study requires focus on the singular task of  
54  
55  
56  
57  
58  
59  
60

determining priority items for developing future caregiver support intervention. It is necessary to engage those who contribute to healthcare decision-making, policy development and provision.

### **Issues of anonymity in Delphi research**

Providing participant anonymity distinguishes online Delphi studies from other research methodologies that involve expert participation, for example, in focus groups. Ensuring experts' anonymity can mitigate the potentially negative impacts relating to different power relationships and expert status [34], and individuals may feel more confident to submit their views openly and freely without group pressure or judgment [33]. There is no agreement upon level of anonymity or de-identification [34]. Advantages of not providing anonymity are noted to promote recruitment due to association with other experts and introducing greater accountability for considered responses [34]. While balancing advantages and disadvantages and also recognizing challenges relating to a small but well-established cancer caregiver research community, the present study will preserve participant anonymity.

### **DISSEMINATION PLAN**

A lay summary of results will be sent to participants on completion of the study. Results will be presented as the total number of factors generated in Q1, a summary of factors taken into Q2, and the final results from Q3. Expert recommendations will be drafted for refinement and verification in ongoing research. It is anticipated that the results of this research project will be published in peer-reviewed journals and presented in a variety of organizational, conference and social media forums.

**Contributors** SB, SDL, PL, SA, AU conceived the study and drafted the initial protocol manuscript. SB, SDL, PL, SA, AB, PS, SC, MK, AU are responsible for the design of the study and SB, SDL, PL, SA, AB, PS, SC, MK, AU critically revised the manuscript and related study materials. All authors have read and approved the final manuscript.

**Funding** Dr Anna Ugalde is the recipient of a Victorian Cancer Agency Early Career Seed Grant. Dr Sylvie Lambert is funded by a Canada Research Chair (Tier 2).

**Competing interests** None declared. All authors have completed the ICMJE uniform disclosure form.

**Figure 1**

**Figure 2**

**REFERENCES**

1. Edwards BK, Howe HL, Ries LAG, Thun MJ, Rosenberg HM, Yancik R, et al. Annual Report to the Nation on the status of cancer, 1973–1999, featuring implications of age and aging on U.S. cancer burden. *Cancer*. 2002;94(10):2766-92.
2. Vanderwerker LC, Laff RE, Kadan-Lottick NS, McColl S, Prigerson HG. Psychiatric disorders and mental health service use among caregivers of advanced cancer patients. *J Clin Oncol*. 2005;23(28):6899.
3. Van Ryn M, Sanders S, Kahn K, Van Houtven C, Griffin JM, Martin M, et al. Objective burden, resources, and other stressors among informal cancer caregivers: A hidden quality issue? *Psychooncology*. 2011;20(1):44-52.
4. Braun M, Mikulincer M, Rydall A, Walsh A, Rodin G. Hidden morbidity in cancer: Spouse caregivers. *J Clin Oncol*. 2007;25(30):4829-34.
5. Lambert SD, Harrison JD, Smith E, Bonevski B, Carey M, Lawsin C, et al. The unmet needs of partners and caregivers of adults diagnosed with cancer: A systematic review. *BMJ Support Palliat Care*. 2012:bmjspcare-2012-000226.
6. Weitzner MA, McMillan SC, Jacobsen PB. Family caregiver quality of life: Differences between curative and palliative cancer treatment settings. *J Pain Symptom Manage*. 1999;17(6):418-28.
7. Given CW, Given B, Stommel M, Collins C, King S, Franklin S. The caregiver reaction assessment (CRA) for caregivers to persons with chronic physical and mental impairments. *Res Nurs Health*. 1992;15(4):271-83.
8. Grov EK, Dahl AA, Moum T, Fosså SD. Anxiety, depression, and quality of life in caregivers of patients with cancer in late palliative phase. *Ann Oncol*. 2005;16(7):1185-91.
9. Ugalde A, Krishnasamy M, Schofield P. Role recognition and changes to self-identity in family caregivers of people with advanced cancer: A qualitative study. *Support Care Cancer*. 2012;20(6):1175-81.
10. Rhee YS, Yun YH, Park S, Shin DO, Lee KM, Yoo HJ, et al. Depression in family caregivers of cancer patients: The feeling of burden as a predictor of depression. *J Clin Oncol*. 2008;26(36):5890-5.
11. Lambert S, Girgis A, Descallar J, Levesque JV, Jones B. Trajectories of mental and physical functioning among spouse caregivers of cancer survivors over the first five years following the diagnosis. *Patient Educ Couns*. 2017;100(6):1213-21.
12. Wolff JL, Dy SM, Frick KD, Kasper JD. End-of-life care: Findings from a national survey of informal caregivers. *Arch Intern Med*. 2007;167(1):40-6.
13. Applebaum AJ, Breitbart W. Care for the cancer caregiver: A systematic review. *Palliat Support Care*. 2013;11(3):231-52.
14. Candy B, Jones L, Drake R, Leurent B, King M. Interventions for supporting informal caregivers of patients in the terminal phase of a disease. *Cochrane Database Syst Rev*. 2009;6.



15. Chambers SK, Pinnock C, Lepore SJ, Hughes S, O'Connell DL. A systematic review of psychosocial interventions for men with prostate cancer and their partners. *Patient Educ Couns*. 2011;85(2):e75-e88.
16. Harding R, Higginson IJ. What is the best way to help caregivers in cancer and palliative care? A systematic literature review of interventions and their effectiveness. *Palliat Med*. 2003;17(1):63-74.
17. Harding R, List S, Epiphaniou E, Jones H. How can informal caregivers in cancer and palliative care be supported? An updated systematic literature review of interventions and their effectiveness. *Palliat Med*. 2012;26(1):7-22.
18. Hudson PL, Remedios C, Thomas K. A systematic review of psychosocial interventions for family carers of palliative care patients. *BMC Palliat Care*. 2010;9(1):17.
19. Northouse LL, Katapodi MC, Song L, Zhang L, Mood DW. Interventions with family caregivers of cancer patients: Meta-analysis of randomized trials. *CA Cancer J Clin*. 2010;60(5):317-39.
20. Ferrell B, Wittenberg E. A review of family caregiving intervention trials in oncology. *CA Cancer J Clin*. 2017;67:318-325.
21. Northouse LL, Katapodi MC, Song L, Zhang L, Mood DW. Interventions with family caregivers of cancer patients: Meta-analysis of randomized trials. *CA Cancer J Clin*. 2010;60(5):317-39.
22. Lambert SD, Ould Brahim, L. \*, Morrison, M., Girgis, A., Yaffe, M., Belzile, E., Clayberg, K., Robinson, J., Thorne, S., Bottorff, J.L., Duggleby, W., Camobell-Enns, H., Youngmee, K., Loiselle, C. Priorities for caregiver research in cancer care: An international Delphi survey of caregivers, clinicians, managers, and researchers. *Support Care Cancer*. 2018 (forthcoming).
23. Schardt C, Adams MB, Owens T, Keitz S, Fontelo P. Utilization of the PICO framework to improve searching PubMed for clinical questions. *BMC Med Inform Decis Mak*. 2007;7(1):16.
24. Chan A-W, Tetzlaff JM, Gøtzsche PC, Altman DG, Mann H, Berlin JA, et al. SPIRIT 2013 explanation and elaboration: Guidance for protocols of clinical trials. *BMJ*. 2013;346:e7586.
25. Viergever RF, Olifson S, Ghaffar A, Terry RF. A checklist for health research priority setting: Nine common themes of good practice. *Health Res Policy Syst*. 2010;8(1):36.
26. Bryant J, Sanson-Fisher R, Walsh J, Stewart J. Health research priority setting in selected high income countries: A narrative review of methods used and recommendations for future practice. *Cost Eff Resour Alloc*. 2014;12(1):23.
27. Okoli C, Pawlowski SD. The Delphi method as a research tool: An example, design considerations and applications. *Inf Manag*. 2004;42(1):15-29.
28. Breen LJ, O'Connor M, Calder S, Tai V, Cartwright J, Beilby JM. The health professionals' perspectives of support needs of adult head and neck cancer survivors and their families: A Delphi study. *Support Care Cancer*. 2017;25(8):2413-20.
29. Galán S, Vega R, Tomé Pires C, Racine M, Sole E, Jensen M, et al. What are the needs of adolescents and young adults after a cancer treatment? A Delphi study. *Eur J Cancer*. 2017;26(2).

- 1
- 2
- 3 30. Hui D, Mori M, Meng Y-C, Watanabe SM, Caraceni A, Strasser F, et al. Automatic referral to
- 4 standardize palliative care access: An international Delphi survey. *Support Care Cancer*.
- 5 2018;26(1):175-80.
- 6
- 7 31. Tetzlaff JM, Moher D, Chan A-W. Developing a guideline for clinical trial protocol content:
- 8 Delphi consensus survey. *Trials*. 2012;13(1):176.
- 9
- 10 32. Blaschke S, O'Callaghan CC, Schofield P. Identifying opportunities for nature engagement in
- 11 cancer care practice and design: Protocol for four-round modified electronic Delphi. *BMJ Open*.
- 12 2017;7(3):e013527.
- 13
- 14 33. Keeney S, Hasson F, McKenna HP. A critical review of the Delphi technique as a research
- 15 methodology for nursing. *Int J Nurs Stud*. 2001;38(2):195-200.
- 16
- 17 34. Mullen PM. Delphi: Myths and reality. *J Health Organ Manag*. 2003;17(1):37-52.
- 18
- 19 35. Schmidt RC. Managing Delphi surveys using nonparametric statistical techniques\*. *Decision*
- 20 *Sci*. 1997;28(3):763-74.
- 21
- 22 36. Schmidt R, Lyytinen K, Mark Keil PC. Identifying software project risks: An international
- 23 Delphi study. *JMIS*. 2001;17(4):5-36.
- 24
- 25 37. QSR I. NVivo qualitative data analysis software for Macintosh, version 10: QSR International
- 26 Pty Ltd; 2014.
- 27
- 28 38. Strauss A, Corbin JM. Basics of qualitative research: Grounded theory procedures and
- 29 techniques. Thousand Oaks, CA: Sage Publications, Inc; 1990.
- 30
- 31 39. IBM C. IBM SPSS Statistics for Macintosh, version 23. Armonk, NY: IBM Corp; 2013.
- 32
- 33 40. Meskell P, Murphy K, Shaw DG, Casey D. Insights into the use and complexities of the
- 34 Policy Delphi technique. *Nurse Res (2014+)*. 2014;21(3):32.
- 35
- 36 41. Sackett DL, Rosenberg WM, Gray JM, Haynes RB, Richardson WS. Evidence based
- 37 medicine: what it is and what it isn't. *BMJ*; 1996;312:71 .
- 38
- 39 42. Huang X, Lin J, Demner-Fushman D, editors. Evaluation of PICO as a knowledge
- 40 representation for clinical questions. *AMIA annual symposium proceedings; 2006: American*
- 41 *Medical Informatics Association*.
- 42
- 43 43. Chambliss ML, Conley J. Answering clinical questions. *Fam Pract Manag*. 1996;43(2):140-5.
- 44
- 45 44. Currie LM, Graham M, Allen M, Bakken S, Patel V, Cimino JJ, editors. Clinical information
- 46 needs in context: an observational study of clinicians while using a clinical information system.
- 47 *AMIA Annual Symposium Proceedings; 2003: American Medical Informatics Association*.
- 48
- 49 45. Gorman PN, Helfand M. Information seeking in primary care: How physicians choose which
- 50 clinical questions to pursue and which to leave unanswered. *Med Decis Making*. 1995;15(2):113-9.
- 51
- 52 46. Ebell M. Information at the point of care: answering clinical questions. *J Am Board Fam*
- 53 *Med*. 1999;12:225-35.
- 54
- 55
- 56
- 57
- 58
- 59
- 60

- 1  
2  
3 47. Richardson WS, Wilson MC, Nishikawa J, Hayward RS. The well-built clinical question: a  
4 key to evidence-based decisions. *ACP J Club*. 1995;123(3):A12-A.  
5  
6 48. Ugalde A, Haynes K, Boltong A, White V, Krishnasamy M, Schofield P, et al. Self-guided  
7 interventions for managing psychological distress in people with cancer – A systematic review.  
8 *Patient Educ Couns*. 2017;100(5):846-57.  
9  
10 49. Faller H, Schuler M, Richard M, Heckl U, Weis J, Küffner R. Effects of psycho-oncologic  
11 interventions on emotional distress and quality of life in adult patients with cancer: Systematic  
12 review and meta-analysis. *J Clin Oncol*. 2013;31(6):782-93.  
13  
14 50. Critcher C, Gladstone B. Utilizing the Delphi technique in policy discussion: a case study of a  
15 privatized utility in Britain. *Public Adm*. 1998;76(3):431-49.  
16  
17 51. Hardy DJ, O'Brien AP, Gaskin CJ, O'Brien AJ, Morrison - Ngatai E, Skews G, et al. Practical  
18 application of the Delphi technique in a bicultural mental health nursing study in New Zealand. *J Adv*  
19 *Nurs*. 2004;46(1):95-109.  
20  
21 52. McKenna HP. The Delphi technique: a worthwhile research approach for nursing? *J Adv*  
22 *Nurs*. 1994;19(6):1221-5.  
23  
24 53. Linstone HA, Turoff M. *The Delphi method: Techniques and applications*: Addison-Wesley  
25 Reading, MA; 1975.  
26  
27 54. Hasson F, Keeney S. Enhancing rigour in the Delphi technique research. *Technol Forecast*  
28 *Soc Change*. 2011;78(9):1695-704.  
29  
30 55. Baker J, Lovell K, Harris N. How expert are the experts? An exploration of the concept of  
31 'expert' within Delphi panel techniques. *Nurse Res*. 2006;14(1):59-70.  
32  
33 56. Goodare H, Lockwood S. Involving patients in clinical research: improves the quality of  
34 research. *BMJ*;1999:724-725.  
35  
36  
37  
38  
39  
40  
41  
42  
43  
44  
45  
46  
47  
48  
49  
50  
51  
52  
53  
54  
55  
56  
57  
58  
59  
60

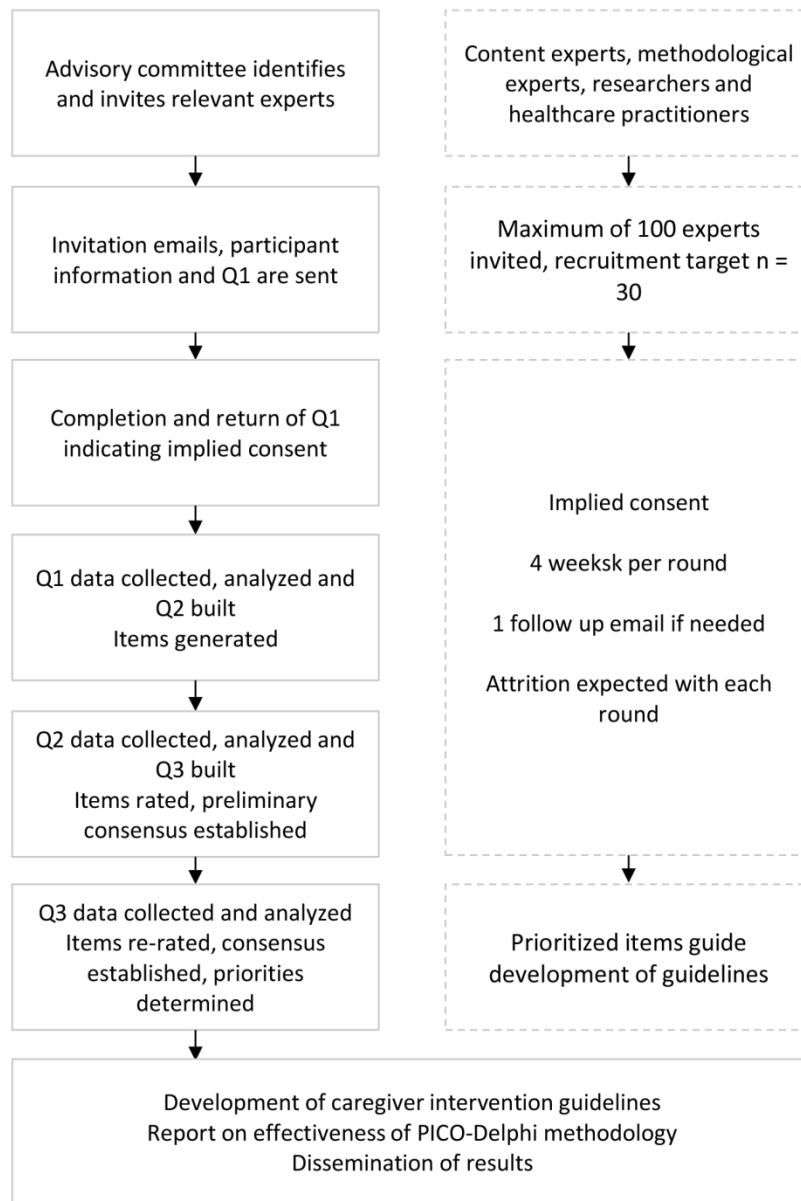

Figure 1

122x179mm (300 x 300 DPI)

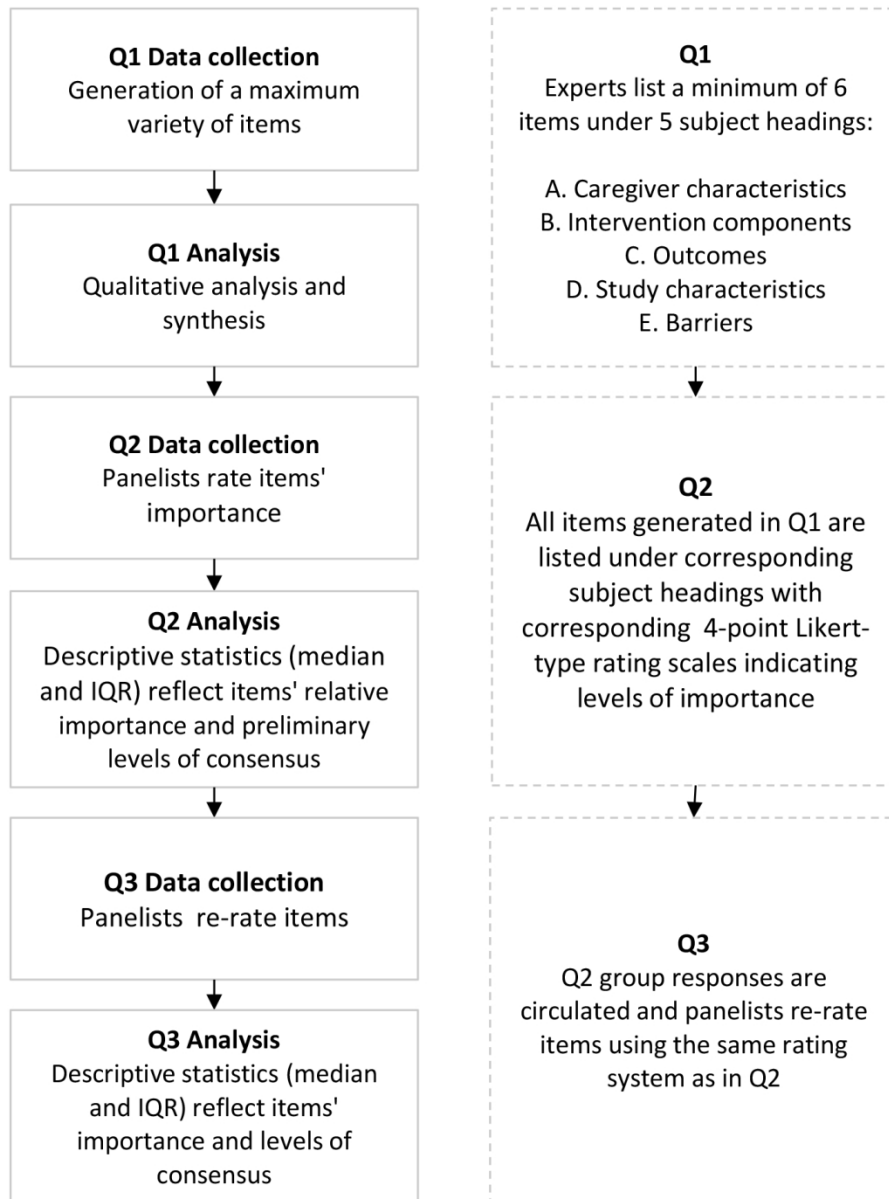

Figure 2

122x161mm (300 x 300 DPI)

# BMJ Open

## Identifying priorities for cancer caregiver interventions: Protocol for a three round modified Delphi study

|                                 |                                                                                                                                                                                                                                                                                                                                                                                                                                                                                                                                                                                                                            |
|---------------------------------|----------------------------------------------------------------------------------------------------------------------------------------------------------------------------------------------------------------------------------------------------------------------------------------------------------------------------------------------------------------------------------------------------------------------------------------------------------------------------------------------------------------------------------------------------------------------------------------------------------------------------|
| Journal:                        | <i>BMJ Open</i>                                                                                                                                                                                                                                                                                                                                                                                                                                                                                                                                                                                                            |
| Manuscript ID                   | bmjopen-2018-024725.R1                                                                                                                                                                                                                                                                                                                                                                                                                                                                                                                                                                                                     |
| Article Type:                   | Protocol                                                                                                                                                                                                                                                                                                                                                                                                                                                                                                                                                                                                                   |
| Date Submitted by the Author:   | 30-Sep-2018                                                                                                                                                                                                                                                                                                                                                                                                                                                                                                                                                                                                                |
| Complete List of Authors:       | Blaschke, Sarah; Peter MacCallum Cancer Institute, Department of Cancer Experiences Research<br>Lambert, Sylvie; McGill University, Ingram School of Nursing; McGill University<br>Livingston, Patricia; Deakin University, Burwood, Australia<br>Aranda, Sanchia; Cancer Council Australia<br>Boltong, Anna; Victorian Comprehensive Cancer Centre<br>Schofield, Penelope ; The University of Melbourne; Swinburne University of Technology<br>Chambers, Suzanne; University of Technology Sydney Faculty of Health<br>Krishnasamy, Meinir; University of Melbourne,<br>Ugalde, Anna; Deakin University Faculty of Health |
| <b>Primary Subject Heading</b>: | Oncology                                                                                                                                                                                                                                                                                                                                                                                                                                                                                                                                                                                                                   |
| Secondary Subject Heading:      | Evidence based practice                                                                                                                                                                                                                                                                                                                                                                                                                                                                                                                                                                                                    |
| Keywords:                       | Delphi, Caregiver, Cancer, Intervention                                                                                                                                                                                                                                                                                                                                                                                                                                                                                                                                                                                    |
|                                 |                                                                                                                                                                                                                                                                                                                                                                                                                                                                                                                                                                                                                            |

SCHOLARONE™  
Manuscripts

1  
2  
3  
4  
5 **Identifying priorities for cancer caregiver interventions: Protocol for a three round**  
6 **modified Delphi study**  
7

8  
9  
10 **Authors**

11 Sarah Blaschke<sup>1</sup>, Sylvie D. Lambert<sup>2</sup>, Patricia M. Livingston<sup>3</sup>, Sanchia Aranda<sup>4</sup>, Anna  
12 Boltong<sup>5</sup>, Penelope Schofield<sup>6</sup>, Suzanne Chambers<sup>7</sup>, Meinir Krishnasamy<sup>5,8</sup>, Anna Ugalde<sup>3</sup>  
13  
14  
15

16 <sup>1</sup> Department of Cancer Experiences Research, Peter MacCallum Cancer Centre, Melbourne,  
17 Australia  
18

19 <sup>2</sup> Department of Biology, McGill University, Montreal, Canada  
20

21 <sup>3</sup> School of Nursing & Midwifery, Faculty of Health, Deakin University, Geelong, Australia  
22

23 <sup>4</sup> Cancer Council Australia, Sydney, Australia  
24

25 <sup>5</sup> Victorian Comprehensive Cancer Centre, Parkville, Australia  
26

27 <sup>6</sup> Department of Psychology, Swinburne University, Hawthorn, Australia  
28

29 <sup>7</sup> University of Technology, Sydney, Australia  
30

31 <sup>8</sup> Centre for Cancer Research, University of Melbourne, Parkville, Victoria, Australia  
32  
33  
34  
35  
36  
37  
38

39 **Corresponding Author**

40  
41 Anna Ugalde

42 T: +61 3 9244 3937

43 E: [a.ugalde@deakin.edu.au](mailto:a.ugalde@deakin.edu.au)

44 A: 1 Gheringhap Street Geelong, Victoria, Australia 3220  
45  
46  
47  
48  
49  
50  
51  
52  
53  
54  
55  
56  
57  
58  
59  
60

## Abstract

**Introduction** Cancer is often considered a chronic disease, and most people with cancer have a caregiver, often a family member or friend who provides a significant amount of care during the illness trajectory. Caregivers are frequently in need of support, and a range of interventions have been trialed to improve outcomes. Consensus for optimal ways to support caregivers is not known. The aim of this protocol paper is to describe procedures for a modified Delphi study to explore expert consensus about important factors when developing caregiver interventions.

**Methods and analysis** Online modified Delphi methodology will be used to establish consensus for important caregiver intervention factors incorporating the PICO framework. Round 1 will comprise a free-text questionnaire and invite the panel to contribute factors they deem important in the development and evaluation of caregiver interventions. Round 2 is designed to determine preliminary consensus of the importance of factors generated in Round 1. The panel will be asked to rate each factor using a 4-point Likert-type scale. The option to state panelists reasoning for their rating will be provided. Descriptive statistics (median scores and IQR) will be calculated to determine each item's relative importance. Levels of consensus will be assessed based on a predefined consensus rating matrix. In Round 3, factors will be re-circulated including aggregate group responses (statistics and comment summaries) and panelist's own Round 2 scores. Panelists will be invited to reconsider their judgments and resubmit ratings using the same rating system as in Round 2. This will result in priority lists based on the panel's total rating scores.

**Ethics and dissemination** Ethics for this study has been gained from Deakin University Human Ethics Advisory Group. It is anticipated that the results will be published in peer-reviewed journals and presented in a variety of forums.

## Strengths and limitations of the study

We adopted the PICO framework for the retrieval of relevant information with which to address the research question and Delphi methodology to explore levels of consensus and assess expert opinion.

Our Delphi study methodology represents a rigorous synthesis of expert opinion, can be replicated by other intervention researchers seeking to investigate and design appropriate interventions for varied clinical populations.



1  
2  
3 A research advisory committee is assembled to inform and guide the purposive sampling of  
4 relevant stakeholders with high expertise in relevant fields, which ensures the input of high  
5 quality information.  
6

7 Given the paucity of evidence with regard to cancer health care professionals' appreciation of  
8 the needs of caregivers, this study focuses solely on participants in professional and academic  
9 roles; however, data from this study will be used to inform future projects that focus  
10 specifically on the views of caregivers.  
11  
12  
13  
14  
15  
16  
17  
18  
19  
20  
21  
22  
23  
24  
25  
26  
27  
28  
29  
30  
31  
32  
33  
34  
35  
36  
37  
38  
39  
40  
41  
42  
43  
44  
45  
46  
47  
48  
49  
50  
51  
52  
53  
54  
55  
56  
57  
58  
59  
60

For peer review only

## INTRODUCTION

The growing rate of people affected by cancer and advances in screening, early detection and treatment mean that more people are expected to live longer with the disease [1]. Many people with cancer have a caregiver, often a friend or family member, who undertakes complex and demanding caregiving tasks [2], often without training or resources [3]. Caregiver needs have shown to parallel or even exceed those of the person with cancer themselves [4, 5]. Negative impacts on caregivers have been reported and can include burden of care provision, depression, anxiety, reduced quality of life, loss of self-identity, loneliness, isolation, and a need for more information [6-11], although, some people also experience positives associated with care provision [7, 12]. Two thirds of caregivers, in a study of two hundred caregivers of people with advanced cancer, reported providing over 80% of the care [2]. Reported caregiving tasks included providing emotional support, administering medications, assisting with bathing, toileting and feeding and other daily living and domestic tasks [2].

Several systematic reviews have been conducted summarizing the cancer caregiver intervention literature [13-20]. Northouse and colleagues [21] presented a meta-analysis of the efficacy of caregiver intervention trials, categorising interventions as psychoeducational, skills training and therapeutic counselling. It was concluded that interventions had small to medium effects and were able to reduce burden, improve coping, self-efficacy and quality of life [21]. In a recent update of the Northouse review, Ferrell and Wittenberg [20] identified an increase in trials, noting that more interventions are being conducted in home settings or by telephone. They also found significant diversity in intervention studies for type, dose, format and content of interventions as well as measures and reported outcomes. Furthermore, the need to translate trials into practice was highlighted [20]. These reviews outline substantial variety in how caregiver interventions are delivered.

Given that interventions are costly, time consuming and challenging to conduct, it is essential that we understand those likely to benefit from intervention, what needs to target within an intervention, and when best to intervene. A recent international Delphi survey set out to identify priority topic areas for cancer caregiver research [22]. Topics achieving high consensus across expert panels included the financial impact of caregiving, routine screening of caregiver-reported outcomes and educating clinicians about caregiver needs. This research presents an important list of broad priorities, however

1  
2  
3 there is opportunity to build on this work through understanding consensus about how caregiver  
4 interventions can be delivered.  
5  
6

7  
8 The growing number of caregivers and associated burden requires careful consideration of multi-  
9 stakeholder views in order to build a comprehensive understanding of the factors that matter most for  
10 developing appropriate support interventions. The present study consists of multi-stakeholder enquiry  
11 by using a sample of clinical and content experts to determine relevant factors for the practical and  
12 clinical delivery of caregiver intervention.  
13  
14  
15

### 16 17 **Aim**

18 The aim is to solicit knowledge and consensus from relevant cancer-specific healthcare and academic  
19 experts in order to develop guidelines for effective caregiver intervention design and evaluation. The  
20 study will aim to elicit levels of expert consensus for five factors: 1) views on the caregivers who  
21 should be the target of interventions; 2) the content and mode of delivery of the interventions; 3) the  
22 potential outcomes and benefits; 4) the appropriate approaches and methodologies to evaluate  
23 caregiver interventions and 5) the barriers to conducting caregiver research.  
24  
25  
26  
27  
28  
29

## 30 **METHOD AND DESIGN**

### 31 **Study design**

32 Determining critical factors for the design and evaluation of caregiver interventions requires rigorous  
33 enquiry into available evidence and relevant expert knowledge. To this end, a new Delphi  
34 methodology was developed, which incorporates the PICO framework [23]. PICO refers to Patient  
35 problem, Intervention, Comparison, and Outcome and is a framework used to answer a well-focused  
36 clinical question by adopting an effective and evidence-based research approach [23]. The PICO  
37 framework is used in this Delphi study to focus expert participation on systematically formulating  
38 factors that are directly relevant to addressing the question at hand. Delphi research uses a multi-  
39 stage, structured and iterative feedback process to elicit levels of opinion consensus on a given topic.  
40 The present study uses the PICO framework in combination with Delphi methodology to  
41 systematically generate new and translatable knowledge. Applying this method, items under each  
42 subject heading will be generated and prioritized based on expert consensus and guidelines for future  
43 caregiver intervention development formulated. The study flow is illustrated in Figure 1. The study  
44 design follows the Standard Protocol Items: Recommendations for Interventional Trials (SPIRIT)  
45 2013 Checklist [24].  
46  
47  
48  
49  
50  
51  
52  
53  
54  
55  
56  
57  
58  
59  
60

[INSERT FIGURE 1 HERE]

**Figure 1** Design of modified Delphi using a series of three questionnaires (Q1 - 3).

### **Advisory committee**

As recommended for priority setting research, an advisory committee has been established [25, 26] with topic and methodological experts, researchers and healthcare practitioners from a range of disciplines. The advisory committee will contribute to the selection of a sample of experts to be invited to the Delphi expert panel and develop guidelines based on the items that have achieved consensus.

### **Rounds and timeline**

In research areas where little is known, it is recommended to plan up to four Delphi rounds to ensure rigor in the development of items and consensus building [27]. However, where research builds on existing knowledge, a trend is evident toward adopting fewer rounds with successful outcomes. Delphi designs with fewer than four rounds have elicited expert agreement on topics such as the supportive care needs of adult cancer survivors [28], the needs of adolescents and young adult survivors [29] and standardized criteria for automatic referral to palliative care services [30]. The present study requires collection of focused expert knowledge to generate pertinent items and understanding of expert consensus in regards to the importance of items in order to set priorities. A 3-round Delphi is proposed to generate pertinent items (Round 1), explore preliminary consensus (Round 2), and finally rate the short-listed items to determine priorities based on levels of consensus achieved (Round 3). The feedback process will be conducted online in four week intervals [31] accounting for sufficient time to gather input, aggregate and re-circulate group responses, and to stepwise build questionnaires as data are collected and analyzed.

### **Questionnaires**

Delphi is an iterative research methodology that builds upon ongoing data collection. Its primary research procedure is the systematic sequencing of questionnaires. Questionnaire 1 (Q1) will be available for distribution at the start of recruitment and Questionnaire 2 (Q2) and Questionnaire 3 (Q3) will be built based on participants' input. Q1, Section A to E representing five factors are

1  
2  
3 outlined in the Data Collection section below. Q1 (item generation) will take approximately 15  
4 minutes to complete and Q2 and Q3 (rating) are anticipated to take no more than 10 minutes to  
5 complete.  
6  
7

## 8 9 **PARTICIPANTS**

### 10 **Selection of experts**

11 Expertise is defined as having both knowledge and experience in a given field and an expert is a  
12 person with the capacity to articulate informed opinion and provide relevant input about their area of  
13 expertise [32]. This study will purposely sample national and international experts in professional  
14 and academic roles from relevant backgrounds able to provide salient information about caregiver  
15 intervention priorities. The advisory committee will use its own professional networks and seek  
16 further referrals for eligible study participants (snowballing). The following list of inclusion criteria  
17 was developed to ensure recruitment of experts with strong understanding of cancer caregiver issues:  
18 (1) healthcare or allied health practitioner with extensive clinical practice experience in oncology; or  
19 (2) have published in the area of cancer caregiver research in the last 10 years, (3) sufficient written  
20 English skills to communicate ideas effectively and capable of contributing relevant input; and (4)  
21 willingness and availability to complete all three rounds.  
22  
23  
24  
25  
26  
27  
28  
29  
30

### 31 **Patient and Public Involvement**

32 In this study, experts are referred to as professionals and academics with expertise in intervention  
33 design and delivery, rather than caregivers or others involved in administration or management of  
34 support resources in the oncology setting. Previous Delphi studies include consumers as experts (e.g.  
35 [29]), whereas others do not include the target group (e.g. [28]). It was expected that caregivers  
36 would have unique views and perspectives [22] that would benefit from being fully explored with a  
37 separate, dedicated and purposefully designed study, incorporating a diverse and representative range  
38 of caregivers. This is considered an important avenue for future work. Patients and public are not  
39 involved in this Delphi study.  
40  
41  
42  
43  
44  
45  
46

### 47 **Sample size**

48 Delphi panel membership is determined by the study purpose and its constraints [33] and can range  
49 from single digits to low hundreds [34]. A panel of ten to eighteen experts is recommended to ensure  
50 sufficient contributions [27, 34]. However, quality of data and levels of expert census are considered  
51 of greater importance than the statistical power of response [35, 36], which distinguishes Delphi  
52 research from a quantitative survey [34]. Taking account of the commonly high dropout rate in  
53 Delphi studies, the recruitment target for this study is a maximum of 30 experts to allow for the input  
54  
55  
56  
57  
58  
59  
60

1  
2  
3 of a diversity of views while accounting for expected attrition. A maximum of 100 experts will be  
4 invited to achieve the minimum target.  
5  
6

### 7 8 **Recruitment**

9 Recruitment will use email invitations containing a short description of the study purpose and  
10 participation requirements and access to Q1. Completion of Q1 will be considered implied consent.  
11 Participation is voluntary and can be withdrawn at any stage. Participants can request their  
12 demographic information and where possible other contributions to be withdrawn; however, due to  
13 the study's iterative process not all contributions can be withdrawn once included in previous rounds.  
14 If provided, reasons for declining or later withdrawal from the study will be recorded.  
15  
16  
17  
18  
19

### 20 **DATA COLLECTION AND ANALYSIS**

21  
22 The data collection and analysis sequence is illustrated in Figure 2 and the procedures for each round  
23 (questionnaire) are detailed below.  
24  
25  
26

27  
28 *[INSERT FIGURE 2]*

29 **Figure 2** Delphi data collection and analysis sequence.  
30  
31  
32

### 33 **Q1 Generation of items**

34 Q1 aims to elicit relevant issues for consideration (items), before quantitatively rating their levels of  
35 importance in future rounds as judged by the expert panel.  
36  
37

38 Sections A to F represent six different questions, and these sections will invite experts to list at least  
39 items they deem of critical importance to the subject headings introduced. Additional space is  
40 provided for detailed descriptions should participants wish to elaborate on their responses.  
41  
42

#### 43 A. Caregiver characteristics

44  
45 *Are there specific groups of cancer caregivers that should be prioritised for intervention*  
46 *research? Consider relevant demographic, medical, personal or clinical factors, to identify*  
47 *high priority groups.*  
48

#### 49 B. Intervention components

50  
51 *What intervention components are important in cancer caregiver intervention research?*  
52 *Consider intervention content, and delivery method, setting and doses, for delivery of*  
53 *optimal interventions.*  
54

#### 55 C. Outcomes

56  
57  
58  
59  
60

1  
2  
3 *Cancer caregiver interventions can target various outcomes, including caregiver, patient or*  
4 *health service factors. Consider important outcomes for cancer caregiver intervention,*  
5 *including who may benefit from interventions and for which outcomes.*  
6

7 D. Study characteristics

8 *Cancer caregiver intervention outcomes can be investigated using a variety of approaches.*  
9 *Consider which methodologies are important in understanding and evaluating the benefits of*  
10 *caregiver interventions.*  
11

12  
13 E. Barriers

14 *What are the most significant barriers to the conduct of caregiver intervention research?*  
15

16  
17 F. Do you have any further comments about priorities for cancer caregiver interventions?  
18  
19  
20

21 Q1 Analysis

22 All data (items and explanations) will be entered and managed in qualitative data analysis software  
23 NVivo [37]. The analysis will involve removing identical responses before subjecting the list of items  
24 to interpretive content analysis as is consistent with the exploratory aim of the first questionnaire.  
25 Each item will be examined and a broad summarizing label (code) will be assigned. These codes will  
26 arise from the data itself rather than be pre-defined. As the analysis progresses and multiple similar  
27 and connected codes arise, the analyst will begin grouping them into summarizing categories. Once  
28 all items are coded and sorted into categories, the analyst will re-read all data and refine the  
29 terminology to ensure all contributions are captured. An inter-rater process will assist interpretative  
30 congruity as recommended for qualitative analysis [38]. In this step, a second member of the project  
31 team will read all raw data and analytic work and any disagreement about interpretation or category  
32 development will be discussed with the analyst until agreement is reached. This generates a list of  
33 statements pertaining to each category.  
34  
35  
36  
37  
38  
39  
40  
41  
42  
43

44 **Q2 Rating items**

45 Q2 will list all generated items according to subject headings they were submitted under and panelists  
46 will be asked to rate each item's importance in order to establish preliminary levels of consensus.  
47 Each item will be presented with a corresponding 4-point Likert-type scale (1 = Very unimportant, 2  
48 = Unimportant, 3 = Important, 4 = Very important) and an option to indicate "No judgment" will be  
49 provided including space for panelists to state their reasoning. To minimize response bias, Q2 will  
50 list the items generated in Q1 without response statistics (number of experts who contributed to each  
51 items).  
52  
53  
54  
55  
56  
57  
58  
59  
60

### Q2 Analysis

Statistical analyses will be performed using IBM SPSS Statistics [39]. Descriptive statistics (median scores and IQR) will be calculated to indicate each item's relative importance based on the full response sample. Delphi studies use variable definitions and thresholds for determining opinion consensus [27]. For purposes of assessing levels of consensus, this study will use a predefined rating matrix, adapted from Meskell and colleagues [40], which is illustrated in Table 1.

### Q3 Prioritizing items

Q3 will be designed to provide panelists the opportunity to reconsider their responses in light of preliminary levels of consensus achieved about the importance of each item. Additionally, the panel will be presented with summary comments about the reasoning for judgments made by other panelists. To assist clarity and consistency, Q3 will follow the same layout as the previous one. All items will be relisted under their respective subject headings with corresponding 4-point Likert-type rating scales. Additionally, this questionnaire will include aggregated statistical group responses generated for each items including: the level of importance of each factor based on group consensus thus far, a summary of group comments and reasoning for ratings of each item, and individual panelist's own Q2 response.

### Q3 Analysis

Analysis for data collected in Q3 will use the same strategy as in the preceding round. The study aims to explore and quantify levels of agreement rather than achieve consensus, therefore this Delphi has been designed to progress through a pre-defined number of three rounds rather than continue until consensus is reached. Statistics will be calculated (median scores and IQR) to describe each item's importance and group consensus will be determined based on the consensus rating matrix. A final priority list of items will be generated.

**Table 1** Consensus rating matrix.

| Importance level | Numerical category of importance rating | High consensus                | Moderate consensus            | Low consensus                 | Direction of consensus |
|------------------|-----------------------------------------|-------------------------------|-------------------------------|-------------------------------|------------------------|
| Very unimportant | One                                     | 70% or more in category one   | 60% or more in category one   | 50% or more in category one   | Low importance         |
| Unimportant      | Two                                     | 70% or more in category two   | 60% or more in category two   | 50% or more in category two   |                        |
| Important        | Three                                   | 70% or more in category three | 60% or more in category three | 50% or more in category three | High importance        |



|                |      |                              |                              |                              |  |
|----------------|------|------------------------------|------------------------------|------------------------------|--|
| Very important | Four | 70% or more in category four | 60% or more in category four | 50% or more in category four |  |
|----------------|------|------------------------------|------------------------------|------------------------------|--|

## ETHICS

The study was approved by the Deakin University Human Ethics Advisory Group. All consented participants will be assigned a unique identification code. Collected demographic information and contact details will include: name, contact phone number, e-mail address, description of professional role, years served in field of expertise, country of professional residence/affiliation. Participants' identifiable information will be matched with their unique identification code in one digital masterfile only. All data collected will be stored safely and securely in locked filing cabinets and in password protected folders on a secure drive (electronic data) that can be accessed only by the study investigators. Data will be kept for 5 years as per local ethics guidelines.

## DISCUSSION

### Combining the PICO framework and Delphi methodology

It is recommended that evidence-based medicine include a rigorous process for the formulation of clinical questions to find precise answers [41, 42]. Research shows that clinicians cross numerous questions in their practice and that up to two thirds remain unanswered [43, 44]. It is held that better question formulation and search process can lead to better solving unanswered questions [42, 45]. To this end, the PICO framework was developed to facilitate focused formulation of answerable clinical queries [23]. PICO is designed to elicit and precisely articulate the elements contained in clinicians' queries, which is considered key to efficiently retrieving relevant evidence for making evidence-based clinical decisions [46, 47] and for guiding searches and content for systematic literature reviews [48, 49]. The PICO framework lends itself to addressing questions such as caregiver intervention priorities, which require collection of items relating to caregivers themselves (P), the types and content of effective interventions (I) and the expected outcomes (O). While the study's information needs does not include a Comparison/Control (C) component, we are additionally interested in discerning the appropriate methodologies for evaluating and researching intervention outcomes. Huang and Demner-Fushman's [42] investigation of the PICO's suitability for clinical queries found that not all questions necessarily utilize all PICO components; in their study of 59 real-world clinical questions only two contained all four PICO elements. While the findings affirm the usefulness of PICO overall, it was noted that complex, real-world questions not always fit its formula squarely and may require modifications [42]. Our research question is focused on the need for healthcare response to the detected lack of appropriate caregiver support.

1  
2  
3 The present study aims to not only collect high quality evidence and expert knowledge but  
4 also prioritize areas of intervention and elicit levels of consensus amongst experts. The findings will  
5 be placed into context with current research priorities and a growing body of work aiming to improve  
6 cancer caregiver outcomes [22]. The Delphi method is well suited to solicit knowledge from varied  
7 expertise and delineate degrees of (dis)agreement [34, 50] and alignment with other work. Delphi  
8 studies are particularly effective in investigating areas where little prior knowledge exists [51], where  
9 empirical data is lacking [52] and, where priority setting is desired [34]. The specific advantages of  
10 the Delphi method adopted in our research include: the ability to collect expert opinion from diverse  
11 disciplines [27], rapid communication processes [53]; overcoming peer-pressure and power struggles  
12 through providing an anonymous forum [54], and the ability to coordinate multi-disciplinary  
13 participants across countries [33]. The present paper aims to illustrate our study design clearly in  
14 order for other intervention researchers to replicate the approach for answering similar questions for  
15 different clinical populations or healthcare contexts. The combination of PICO and Delphi  
16 methodology presents a novel and promising approach to rigorously and rapidly generating  
17 instructive answers to complex healthcare problems.  
18  
19  
20  
21  
22  
23  
24  
25  
26  
27  
28

### 29 **What is an “expert”**

30 The success of a Delphi study is contingent on participants who are able to provide relevant input on  
31 the research topic. The absence of specific guidelines for identifying experts challenge Delphi  
32 researchers to seek suitable participants with appropriate expertise [34, 55]. “Informed advocates”  
33 [34] and “specialist in their field” [33] are terms used by Delphi researchers, but there is little about  
34 the specific qualities needed. In the absence of clear guidelines, the current study will follow the  
35 definition adopted by Blaschke and colleagues [32], which describes the prerequisite qualities of  
36 merited Delphi panelists, “individuals who possess both knowledge and experience representative of  
37 the capacity to articulate informed opinion and provide relevant input about a given topic” (p. 2 – 4).  
38 Consumers are not included in this research with the aim to conduct further work dedicated to  
39 exploring their views. Additionally, exploring the views of administrators in future work would also  
40 generate important data.  
41  
42  
43  
44  
45  
46  
47  
48  
49

### 50 **The Delphi expert panel**

51 Depending on the research objectives, Delphi panels may comprise of experts from a single  
52 discipline or represent a broad mix. A heterogeneous pool of experts may serve innovation and  
53 creative, combinatorial insights into unexplored questions through crosspollination of expertise.  
54 When a research question is already well-focused, a homogeneous panel of experts may serve  
55  
56  
57  
58  
59  
60

1  
2  
3 addressing an identified research need. The present study requires focus on the singular task of  
4 determining priority items for developing future caregiver support intervention. It is necessary to  
5 engage those who contribute to healthcare decision-making, policy development and provision.  
6  
7

### 8 9 **Issues of anonymity in Delphi research**

10 Providing participant anonymity distinguishes online Delphi studies from other research  
11 methodologies that involve expert participation, for example, in focus groups. Ensuring experts'  
12 anonymity can mitigate the potentially negative impacts relating to different power relationships and  
13 expert status [34], and individuals may feel more confident to submit their views openly and freely  
14 without group pressure or judgment [33]. There is no agreement upon level of anonymity or de-  
15 identification [34]. Advantages of not providing anonymity are noted to promote recruitment due to  
16 association with other experts and introducing greater accountability for considered responses [34].  
17 While balancing advantages and disadvantages and also recognizing challenges relating to a small  
18 but well-established cancer caregiver research community, the present study will preserve participant  
19 anonymity.  
20  
21  
22  
23  
24  
25  
26  
27

### 28 29 **STUDY STATUS AND DISSEMINATION**

30 Round 1 data collection for this study began in August 2018. Data analysis is planned to be  
31 completed by October 2018 and will be used to inform rounds 2 and 3, which are anticipated to be  
32 completed by March 2019. The final result of this Delphi study is planned to be submitted for  
33 publication by July 2019. At this stage a lay summary of results will be sent to participants on  
34 completion of the study. Results will be presented as the total number of factors generated in Q1, a  
35 summary of factors taken into Q2, and the final results from Q3. Expert recommendations will be  
36 drafted for refinement and verification in ongoing research. It is anticipated that the results of this  
37 research project will be published in peer-reviewed journals and presented in a variety of  
38 organizational, conference and social media forums.  
39  
40  
41  
42  
43  
44  
45

46 **Contributors** SB, SDL, PL, SA, AU conceived the study and drafted the initial protocol manuscript.  
47 SB, SDL, PL, SA, AB, PS, SC, MK, AU are responsible for the design of the study and SB, SDL,  
48 PL, SA, AB, PS, SC, MK, AU critically revised the manuscript and related study materials. All  
49 authors have read and approved the final manuscript.  
50

51 **Funding** Dr Anna Ugalde is the recipient of a Victorian Cancer Agency Early Career Seed Grant. Dr  
52 Sylvie Lambert is funded by a Canada Research Chair (Tier 2).  
53  
54

55 **Competing interests** None declared. All authors have completed the ICMJE uniform disclosure  
56 form.  
57  
58  
59  
60

1  
2  
3 **Figure 1**

4 **Figure 2**  
5  
6  
7  
8  
9  
10  
11  
12  
13  
14  
15  
16  
17  
18  
19  
20  
21  
22  
23  
24  
25  
26  
27  
28  
29  
30  
31  
32  
33  
34  
35  
36  
37  
38  
39  
40  
41  
42  
43  
44  
45  
46  
47  
48  
49  
50  
51  
52  
53  
54  
55  
56  
57  
58  
59  
60

For peer review only

**REFERENCES**

1. Edwards BK, Howe HL, Ries LAG, Thun MJ, Rosenberg HM, Yancik R, et al. Annual Report to the Nation on the status of cancer, 1973–1999, featuring implications of age and aging on U.S. cancer burden. *Cancer*. 2002;94(10):2766-92.
2. Vanderwerker LC, Laff RE, Kadan-Lottick NS, McColl S, Prigerson HG. Psychiatric disorders and mental health service use among caregivers of advanced cancer patients. *J Clin Oncol*. 2005;23(28):6899.
3. Van Ryn M, Sanders S, Kahn K, Van Houtven C, Griffin JM, Martin M, et al. Objective burden, resources, and other stressors among informal cancer caregivers: A hidden quality issue? *Psychooncology*. 2011;20(1):44-52.
4. Braun M, Mikulincer M, Rydall A, Walsh A, Rodin G. Hidden morbidity in cancer: Spouse caregivers. *J Clin Oncol*. 2007;25(30):4829-34.
5. Lambert SD, Harrison JD, Smith E, Bonevski B, Carey M, Lawsin C, et al. The unmet needs of partners and caregivers of adults diagnosed with cancer: A systematic review. *BMJ Support Palliat Care*. 2012:bmjspcare-2012-000226.
6. Weitzner MA, McMillan SC, Jacobsen PB. Family caregiver quality of life: Differences between curative and palliative cancer treatment settings. *J Pain Symptom Manage*. 1999;17(6):418-28.
7. Given CW, Given B, Stommel M, Collins C, King S, Franklin S. The caregiver reaction assessment (CRA) for caregivers to persons with chronic physical and mental impairments. *Res Nurs Health*. 1992;15(4):271-83.
8. Grov EK, Dahl AA, Moum T, Fosså SD. Anxiety, depression, and quality of life in caregivers of patients with cancer in late palliative phase. *Ann Oncol*. 2005;16(7):1185-91.
9. Ugalde A, Krishnasamy M, Schofield P. Role recognition and changes to self-identity in family caregivers of people with advanced cancer: A qualitative study. *Support Care Cancer*. 2012;20(6):1175-81.
10. Rhee YS, Yun YH, Park S, Shin DO, Lee KM, Yoo HJ, et al. Depression in family caregivers of cancer patients: The feeling of burden as a predictor of depression. *J Clin Oncol*. 2008;26(36):5890-5.
11. Lambert S, Girgis A, Descallar J, Levesque JV, Jones B. Trajectories of mental and physical functioning among spouse caregivers of cancer survivors over the first five years following the diagnosis. *Patient Educ Couns*. 2017;100(6):1213-21.
12. Wolff JL, Dy SM, Frick KD, Kasper JD. End-of-life care: Findings from a national survey of informal caregivers. *Arch Intern Med*. 2007;167(1):40-6.
13. Applebaum AJ, Breitbart W. Care for the cancer caregiver: A systematic review. *Palliat Support Care*. 2013;11(3):231-52.
14. Candy B, Jones L, Drake R, Leurent B, King M. Interventions for supporting informal caregivers of patients in the terminal phase of a disease. *Cochrane Database Syst Rev*. 2009;6.

15. Chambers SK, Pinnock C, Lepore SJ, Hughes S, O'Connell DL. A systematic review of psychosocial interventions for men with prostate cancer and their partners. *Patient Educ Couns*. 2011;85(2):e75-e88.
16. Harding R, Higginson IJ. What is the best way to help caregivers in cancer and palliative care? A systematic literature review of interventions and their effectiveness. *Palliat Med*. 2003;17(1):63-74.
17. Harding R, List S, Epiphaniou E, Jones H. How can informal caregivers in cancer and palliative care be supported? An updated systematic literature review of interventions and their effectiveness. *Palliat Med*. 2012;26(1):7-22.
18. Hudson PL, Remedios C, Thomas K. A systematic review of psychosocial interventions for family carers of palliative care patients. *BMC Palliat Care*. 2010;9(1):17.
19. Northouse LL, Katapodi MC, Song L, Zhang L, Mood DW. Interventions with family caregivers of cancer patients: Meta-analysis of randomized trials. *CA Cancer J Clin*. 2010;60(5):317-39.
20. Ferrell B, Wittenberg E. A review of family caregiving intervention trials in oncology. *CA Cancer J Clin*. 2017;67:318-325.
21. Northouse LL, Katapodi MC, Song L, Zhang L, Mood DW. Interventions with family caregivers of cancer patients: Meta-analysis of randomized trials. *CA Cancer J Clin*. 2010;60(5):317-39.
22. Lambert SD, Ould Brahim, L. \*, Morrison, M., Girgis, A., Yaffe, M., Belzile, E., Clayberg, K., Robinson, J., Thorne, S., Bottorff, J.L., Duggleby, W., Camobell-Enns, H., Youngmee, K., Loiselle, C. Priorities for caregiver research in cancer care: An international Delphi survey of caregivers, clinicians, managers, and researchers. *Support Care Cancer*. 2018 (in press, <https://doi.org/10.1007/s00520-018-4314-y>).
23. Schardt C, Adams MB, Owens T, Keitz S, Fontelo P. Utilization of the PICO framework to improve searching PubMed for clinical questions. *BMC Med Inform Decis Mak*. 2007;7(1):16.
24. Chan A-W, Tetzlaff JM, Gøtzsche PC, Altman DG, Mann H, Berlin JA, et al. SPIRIT 2013 explanation and elaboration: Guidance for protocols of clinical trials. *BMJ*. 2013;346:e7586.
25. Viergever RF, Olifson S, Ghaffar A, Terry RF. A checklist for health research priority setting: Nine common themes of good practice. *Health Res Policy Syst*. 2010;8(1):36.
26. Bryant J, Sanson-Fisher R, Walsh J, Stewart J. Health research priority setting in selected high income countries: A narrative review of methods used and recommendations for future practice. *Cost Eff Resour Alloc*. 2014;12(1):23.
27. Okoli C, Pawlowski SD. The Delphi method as a research tool: An example, design considerations and applications. *Inf Manag*. 2004;42(1):15-29.
28. Breen LJ, O'Connor M, Calder S, Tai V, Cartwright J, Beilby JM. The health professionals' perspectives of support needs of adult head and neck cancer survivors and their families: A Delphi study. *Support Care Cancer*. 2017;25(8):2413-20.

- 1
- 2
- 3 29. Galán S, Vega R, Tomé Pires C, Racine M, Sole E, Jensen M, et al. What are the needs of
- 4 adolescents and young adults after a cancer treatment? A Delphi study. *Eur J Cancer*. 2017;26(2).
- 5
- 6 30. Hui D, Mori M, Meng Y-C, Watanabe SM, Caraceni A, Strasser F, et al. Automatic referral to
- 7 standardize palliative care access: An international Delphi survey. *Support Care Cancer*.
- 8 2018;26(1):175-80.
- 9
- 10 31. Tetzlaff JM, Moher D, Chan A-W. Developing a guideline for clinical trial protocol content:
- 11 Delphi consensus survey. *Trials*. 2012;13(1):176.
- 12
- 13 32. Blaschke S, O'Callaghan CC, Schofield P. Identifying opportunities for nature engagement in
- 14 cancer care practice and design: Protocol for four-round modified electronic Delphi. *BMJ Open*.
- 15 2017;7(3):e013527.
- 16
- 17 33. Keeney S, Hasson F, McKenna HP. A critical review of the Delphi technique as a research
- 18 methodology for nursing. *Int J Nurs Stud*. 2001;38(2):195-200.
- 19
- 20 34. Mullen PM. Delphi: Myths and reality. *J Health Organ Manag*. 2003;17(1):37-52.
- 21
- 22 35. Schmidt RC. Managing Delphi surveys using nonparametric statistical techniques\*. *Decision*
- 23 *Sci*. 1997;28(3):763-74.
- 24
- 25 36. Schmidt R, Lyytinen K, Mark Keil PC. Identifying software project risks: An international
- 26 Delphi study. *JMIS*. 2001;17(4):5-36.
- 27
- 28 37. QSR I. NVivo qualitative data analysis software for Macintosh, version 10: QSR International
- 29 Pty Ltd; 2014.
- 30
- 31 38. Strauss A, Corbin JM. Basics of qualitative research: Grounded theory procedures and
- 32 techniques. Thousand Oaks, CA: Sage Publications, Inc; 1990.
- 33
- 34 39. IBM C. IBM SPSS Statistics for Macintosh, version 23. Armonk, NY: IBM Corp; 2013.
- 35
- 36 40. Meskell P, Murphy K, Shaw DG, Casey D. Insights into the use and complexities of the
- 37 Policy Delphi technique. *Nurse Res* (2014+). 2014;21(3):32.
- 38
- 39 41. Sackett DL, Rosenberg WM, Gray JM, Haynes RB, Richardson WS. Evidence based
- 40 medicine: what it is and what it isn't. *BMJ*; 1996;312:71 .
- 41
- 42 42. Huang X, Lin J, Demner-Fushman D, editors. Evaluation of PICO as a knowledge
- 43 representation for clinical questions. *AMIA annual symposium proceedings*; 2006: American
- 44 *Medical Informatics Association*.
- 45
- 46 43. Chambliss ML, Conley J. Answering clinical questions. *Fam Pract Manag*. 1996;43(2):140-5.
- 47
- 48 44. Currie LM, Graham M, Allen M, Bakken S, Patel V, Cimino JJ, editors. Clinical information
- 49 needs in context: an observational study of clinicians while using a clinical information system.
- 50 *AMIA Annual Symposium Proceedings*; 2003: American Medical Informatics Association.
- 51
- 52 45. Gorman PN, Helfand M. Information seeking in primary care: How physicians choose which
- 53 clinical questions to pursue and which to leave unanswered. *Med Decis Making*. 1995;15(2):113-9.
- 54
- 55
- 56
- 57
- 58
- 59
- 60

- 1  
2  
3 46. Ebell M. Information at the point of care: answering clinical questions. *J Am Board Fam*  
4 *Med.* 1999;12:225-35.  
5  
6 47. Richardson WS, Wilson MC, Nishikawa J, Hayward RS. The well-built clinical question: a  
7 key to evidence-based decisions. *ACP J Club.* 1995;123(3):A12-A.  
8  
9 48. Ugalde A, Haynes K, Boltong A, White V, Krishnasamy M, Schofield P, et al. Self-guided  
10 interventions for managing psychological distress in people with cancer – A systematic review.  
11 *Patient Educ Couns.* 2017;100(5):846-57.  
12  
13 49. Faller H, Schuler M, Richard M, Heckl U, Weis J, Küffner R. Effects of psycho-oncologic  
14 interventions on emotional distress and quality of life in adult patients with cancer: Systematic  
15 review and meta-analysis. *J Clin Oncol.* 2013;31(6):782-93.  
16  
17 50. Critcher C, Gladstone B. Utilizing the Delphi technique in policy discussion: a case study of a  
18 privatized utility in Britain. *Public Adm.* 1998;76(3):431-49.  
19  
20 51. Hardy DJ, O'Brien AP, Gaskin CJ, O'Brien AJ, Morrison - Ngatai E, Skews G, et al. Practical  
21 application of the Delphi technique in a bicultural mental health nursing study in New Zealand. *J Adv*  
22 *Nurs.* 2004;46(1):95-109.  
23  
24 52. McKenna HP. The Delphi technique: a worthwhile research approach for nursing? *J Adv*  
25 *Nurs.* 1994;19(6):1221-5.  
26  
27 53. Linstone HA, Turoff M. *The Delphi method: Techniques and applications*: Addison-Wesley  
28 Reading, MA; 1975.  
29  
30 54. Hasson F, Keeney S. Enhancing rigour in the Delphi technique research. *Technol Forecast*  
31 *Soc Change.* 2011;78(9):1695-704.  
32  
33 55. Baker J, Lovell K, Harris N. How expert are the experts? An exploration of the concept of  
34 'expert' within Delphi panel techniques. *Nurse Res.* 2006;14(1):59-70.  
35  
36  
37  
38  
39  
40  
41  
42  
43  
44  
45  
46  
47  
48  
49  
50  
51  
52  
53  
54  
55  
56  
57  
58  
59  
60



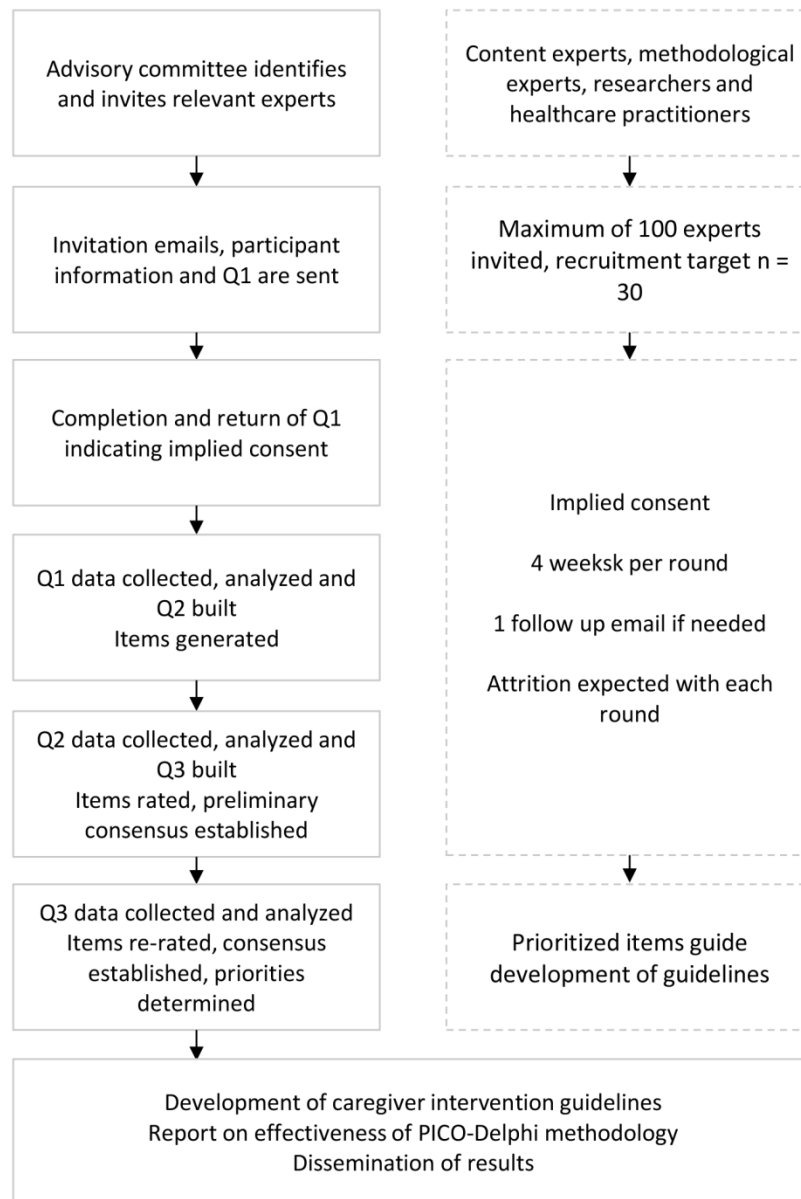

Figure 1

122x179mm (300 x 300 DPI)

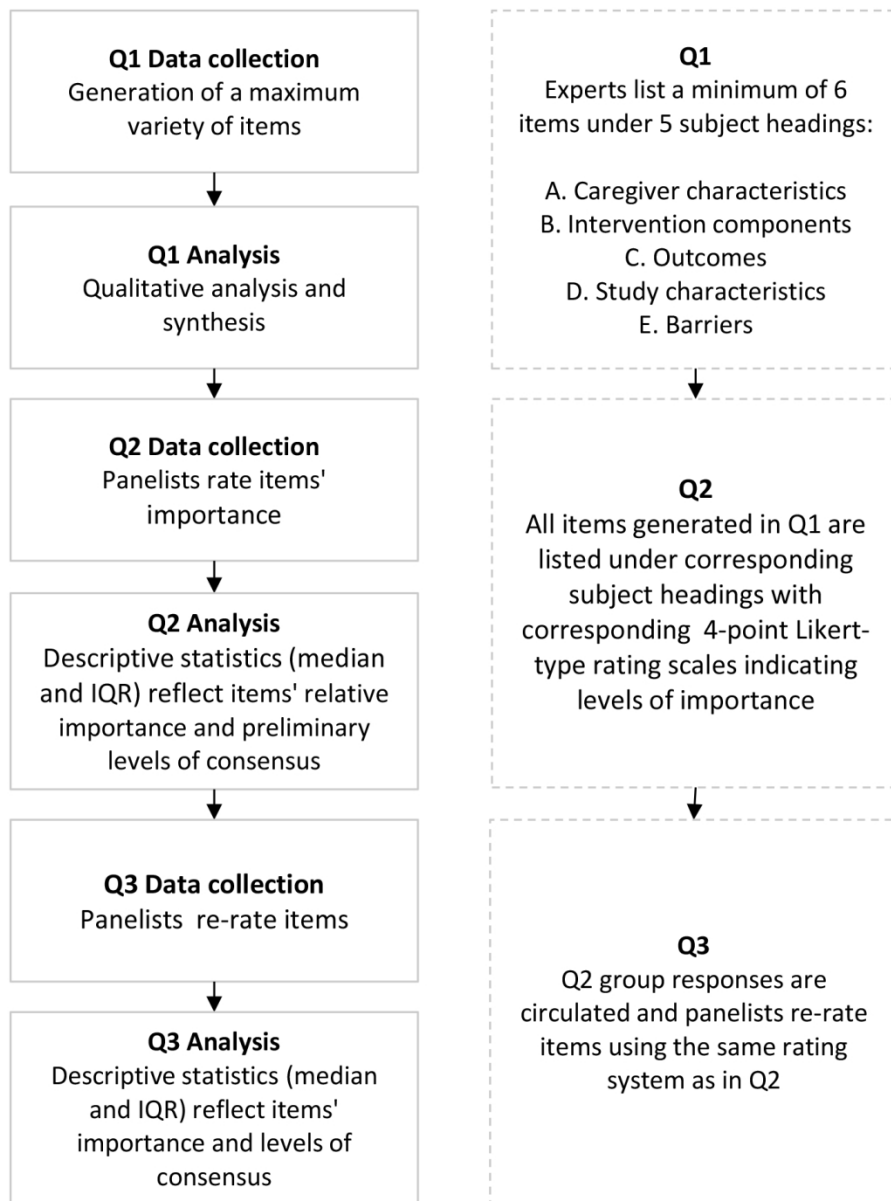

Figure 2

122x161mm (300 x 300 DPI)
